# Supplementary material for: The ectodomains determine ligand function in vivo and selectivity of DLL1 and DLL4 toward NOTCH1 and NOTCH2 in vitro
Source: eLife. 2018 Oct 5;7:e40045. doi: 10.7554/eLife.40045 (PMC6202052; doi:10.7554/eLife.40045)
Supplement: Figure 4—figure supplement 1—source Data 1. — DLL1 and DLL4 protein levels in different ES cell clones were determined by quantitative analysis of Western blots and the relative protein expression was obtained by normalization to DLL1 clone #1 analyzed in the same assay. The value obtained in assay 13 (red) represents an outlier (determined by ROUT analysis using GraphPad Prism7) and was not included in the calculation of the average. [file elife-40045-fig4-figsupp1-data1.xlsx]

## Sheet: Figure 4-figure supplement 1-So
	protein expression level (DLL1 or DLL4 expression intensity/𝛽-Tubulin intensity)															relative protein expression normalized to expression of DLL1 clone #1
	DLL1 clone					DLL4 clone										DLL1 clone					DLL4 clone
	#1	#2	#3	#4		#1	#2	#3	#4	#5	#6	#7	#8	#9	#10	#1	#2	#3	#4		#1	#2	#3	#4	#5	#6	#7	#8	#9	#10
Assay # 1	0.783	0.258														1	0.329695
Assay # 2		0.234															0.298775
Assay # 3		0.244															0.311538
Assay # 4	0.397		0.331	0.218												1		0.833987	0.549321
Assay # 5			0.264	0.196														0.6644	0.493895
Assay # 6			0.227	0.195														0.572587	0.492305
Assay # 7	1.107					0.946										1					0.85411
Assay # 8						0.986															0.890876
Assay # 9						0.644															0.581301
Assay # 10	0.978					0.653										1					0.667377
Assay # 11						0.489															0.499471
Assay # 12						0.473															0.483613
Assay # 13	0.036					0.076										1					2.13895
Assay # 14	0.58					0.416										1					0.717012
Assay # 15	0.227					0.14										1					0.61652
Assay # 16	0.541					0.465										1					0.859282
Assay # 17	1.312					0.989										1					0.754061
Assay # 18	0.975					0.569										1					0.583784
Assay # 19	0.581					0.468										1					0.805416
Assay # 20	0.665					0.437										1					0.656694
Assay # 21	0.603						0.689	0.313								1						1.1432	0.519096
Assay # 22							0.664	0.32														1.10078	0.530765
Assay # 23							0.556	0.353														0.922623	0.585336
Assay # 24	1.005								0.716	0.647						1								0.712796	0.643429
Assay # 25									0.831	0.52														0.82723	0.517077
Assay # 26									0.651	0.548														0.648223	0.545101
Assay # 27	1.107										1.26					1										1.13775
Assay # 28											1.007															0.909212
Assay # 29											0.998															0.901621
Assay # 30	1.216											1.464	1.245			1											1.2047	1.02459
Assay # 31												1.434	1.213														1.17955	0.997563
Assay # 32												1.111	1.11														0.913916	0.913133
Assay # 33	0.564													1.249	0.803	1													2.21553	1.42446
Assay # 34														0.731	0.27														1.29589	0.478792
Assay # 35														0.823	0.471														1.46026	0.834742
Mean	0.745706	0.245333	0.274	0.203		0.553643	0.636333	0.328667	0.732667	0.571667	1.08833	1.33633	1.18933	0.934333	0.514667	1	0.313336	0.690325	0.511841		0.793462	1.05553	0.545066	0.729416	0.568536	0.982862	1.09939	0.978427	1.65723	0.912664
StDev	0.356091	0.0120554	0.0527162	0.013		0.27823	0.0706847	0.021362	0.0911501	0.0667258	0.148736	0.19572	0.0705431	0.276364	0.26917	0	0.0155378	0.132614	0.0324691		0.408815	0.117043	0.0353598	0.0906535	0.0663557	0.134194	0.161114	0.0581389	0.490443	0.477624
