# Supplementary material for: The ectodomains determine ligand function in vivo and selectivity of DLL1 and DLL4 toward NOTCH1 and NOTCH2 in vitro
Source: eLife. 2018 Oct 5;7:e40045. doi: 10.7554/eLife.40045 (PMC6202052; doi:10.7554/eLife.40045)
Supplement: Figure 4—figure supplement 1—source Data 2. — N1 and N2 activation by different ES cell clones expressing DLL1 and DLL4. [file elife-40045-fig4-figsupp1-data2.xlsx]

## Sheet: Figure 4-figure supplement 1-S1
		N1 activation																	N2 activation
		DLL1 clone					DLL4 clone												DLL1 clone					DLL4 clone
		#1	#2	#3	#4		#1	#2	#3	#4	#5	#6	#7	#8	#9	#10			#1	#2	#3	#4		#1	#2	#3	#4	#5	#6	#7	#8	#9	#10
relative luciferase units minus background (rel. luciferase activity (units))	Assay # 1	393.5					6211.5										relative luciferase units minus background (rel. luciferase activity (units))	Assay # 1	232.5					90
	Assay # 2	465.5					6750											Assay # 2	191					48
	Assay # 3	698.5					7906											Assay # 3	369.5					145.5
	Assay # 4	408.5					5638											Assay # 4	259					76.5
	Assay # 5	348					5616.5											Assay # 5	185					58.5
	Assay # 6	329					2917.5											Assay # 6	156					88.5
	Assay # 7	354.5					4504											Assay # 7	318					119
	Assay # 8	505					5335.5											Assay # 8	350.5					125
	Assay # 9	563					6277.5											Assay # 9	612					175
	Assay # 10	250					2613.5											Assay # 10	297.5					110.5
	Assay # 11	241					2675.5											Assay # 11	539.5					290
	Assay # 12	311					3474											Assay # 12	591.5					241.5
	Assay # 13	223					2830.5											Assay # 13	654					237.5
	Assay # 14	414					4927											Assay # 14	728.5					296.5
	Assay # 15	425.5					5188											Assay # 15	599					300.5
	Assay # 16	301					4353											Assay # 16	825					300
	Assay # 17	323.5					5532.5											Assay # 17	597.5					458.5
	Assay # 18	403.5					8908											Assay # 18	614.5					310
	Assay # 19	328.5					6435.5											Assay # 19	479.5					288
	Assay # 20	1029					11614.5											Assay # 20	673					331
	Assay # 21	356.5					4495											Assay # 21	442.5					209
	Assay # 22	240					4982.5											Assay # 22	345.5					186
	Assay # 23	300					4400											Assay # 23	234					143
	Assay # 24	374					6537.5											Assay # 24	330					251
	Assay # 25	261					4717											Assay # 25	294.5					244
	Assay # 26	446					4211.5											Assay # 26	310					95
	Assay # 27	341					4048.5											Assay # 27	292					125
	Assay # 28	248					2463											Assay # 28	230					103
	Assay # 29	183.5					2443.5											Assay # 29	205.5					96.5
	Assay # 30	208.5					2813.5											Assay # 30	171.5					64.5
	Assay # 31	469	214.5	761.5	411		5266.5											Assay # 31	106.5	123.5	289	352.5		71.5
	Assay # 32	572	128	468.5	329.5		4512.5											Assay # 32	192.5	172	299.5	499.5		111
	Assay # 33	307	219.5	448.5	225.5		3804											Assay # 33	233	354.5	392	391		223.5
	Assay # 34	606					3728	7503	5761.5	6112	6297.5	5495.5	4005.5	3025	4300.5	3954		Assay # 34	581.5					256	423	144.5	199	244	320.5	187	237	183	202.5
	Assay # 35	184					1297.5	1577.5	1535	1597	1264	1674	1442.5	1509	1896.5	1714		Assay # 35	214					85	325	59.5		112	153	126	86.5	128	203
	Assay # 36	583					1556.5	4590	3741	3504	2523	2481.5	1705.5	2057.5	2802	2303.5		Assay # 36	422					110	240	89.5	247	243	206.5	283.5	224.5	213	294
	Assay # 37	298					3070.5	3147.5	3241	3384	3254.5	4210.5	2849	2762.5	3651	3306		Assay # 37	413.5					111.5	164	145.5	171.5	160.5	221.5	153	114.5	240	300.5
	Assay # 38	575					5263											Assay # 38	99					46
	Assay # 39	260					2172											Assay # 39	83					37
relative	Mean	387.897	187.333	559.5	322		4653.62	4204.5	3569.62	3649.25	3334.75	3465.38	2500.62	2338.5	3162.5	2819.38		Mean	371.115	216.667	326.833	414.333		170.731	288	109.75	205.833	189.875	225.375	187.375	165.625	191	250
	StDev	165.071	51.445	175.223	92.9771		966.39	2519.73	1739.86	1859.06	2139.41	1717.91	1174.43	687.529	1043.45	1002.02		StDev	195.239	121.806	56.6797	76.2272		40.9329	111.466	42.5078	38.211	65.0107	69.9004	68.7718	76.2347	48.0208	54.6245
activation normalized to DLL1 clone #1 (normalized Notch activation)	Assay # 1	1					15.7853										activation normalized to DLL1 clone #1 (normalized Notch activation)	Assay # 1	1					0.387097
	Assay # 2	1					14.5005											Assay # 2	1					0.251309
	Assay # 3	1					11.3185											Assay # 3	1					0.393775
	Assay # 4	1					13.8017											Assay # 4	1					0.295367
	Assay # 5	1					16.1394											Assay # 5	1					0.316216
	Assay # 6	1					8.86778											Assay # 6	1					0.567308
	Assay # 7	1					12.7052											Assay # 7	1					0.374214
	Assay # 8	1					10.5653											Assay # 8	1					0.356633
	Assay # 9	1					11.1501											Assay # 9	1					0.285948
	Assay # 10	1					10.454											Assay # 10	1					0.371429
	Assay # 11	1					11.1017											Assay # 11	1					0.537535
	Assay # 12	1					11.1704											Assay # 12	1					0.408284
	Assay # 13	1					12.6928											Assay # 13	1					0.36315
	Assay # 14	1					11.901											Assay # 14	1					0.407001
	Assay # 15	1					12.1927											Assay # 15	1					0.501669
	Assay # 16	1					14.4618											Assay # 16	1					0.363636
	Assay # 17	1					17.102											Assay # 17	1					0.767364
	Assay # 18	1					22.0768											Assay # 18	1					0.504475
	Assay # 19	1					19.5906											Assay # 19	1					0.600626
	Assay # 20	1					11.2872											Assay # 20	1					0.491828
	Assay # 21	1					12.6087											Assay # 21	1					0.472316
	Assay # 22	1					20.7604											Assay # 22	1					0.53835
	Assay # 23	1					14.6667											Assay # 23	1					0.611111
	Assay # 24	1					17.4799											Assay # 24	1					0.760606
	Assay # 25	1					18.0728											Assay # 25	1					0.828523
	Assay # 26	1					9.44283											Assay # 26	1					0.306452
	Assay # 27	1					11.8724											Assay # 27	1					0.428082
	Assay # 28	1					9.93145											Assay # 28	1					0.447826
	Assay # 29	1					13.3161											Assay # 29	1					0.469586
	Assay # 30	1					13.494											Assay # 30	1					0.376093
	Assay # 31	1	0.457356	1.62367	0.876333		11.2292											Assay # 31	1	1.15962	2.71362	3.30986		0.671362
	Assay # 32	1	0.223776	0.819056	0.576049		7.88899											Assay # 32	1	0.893506	1.55584	2.59481		0.576623
	Assay # 33	1	0.714984	1.46091	0.734528		12.3909											Assay # 33	1	1.52146	1.6824	1.67811		0.959227
	Assay # 34	1					6.15182	12.3812	9.50743	10.0858	10.3919	9.06848	6.60974	4.99175	7.09653	6.52475		Assay # 34	1					0.440241	0.727429	0.248495	0.342218	0.419604	0.551161	0.321582	0.407567	0.314703	0.348237
	Assay # 35	1					7.05163	8.57337	8.34239	8.67935	6.86957	9.09783	7.83967	8.20109	10.3071	9.31522		Assay # 35	1					0.397196	1.51869	0.278037		0.523364	0.714953	0.588785	0.404206	0.598131	0.948598
	Assay # 36	1					2.66981	7.87307	6.41681	6.01029	4.32762	4.25643	2.92539	3.52916	4.80617	3.95111		Assay # 36	1					0.260664	0.56872	0.212085	0.585308	0.575829	0.489336	0.671801	0.531991	0.504739	0.696682
	Assay # 37	1					10.3037	10.5621	10.8758	11.3557	10.9211	14.1292	9.5604	9.27013	12.2517	11.094		Assay # 37	1					0.269649	0.396614	0.351874	0.414752	0.38815	0.535671	0.370012	0.276904	0.580411	0.726723
	Assay # 38	1					9.15304											Assay # 38	1					0.464646
	Assay # 39	1					8.35385											Assay # 39	1					0.445783
	Mean	1	0.465372	1.30121	0.72897		12.4539	9.84743	8.78562	9.03279	8.12756	9.13798	6.7338	6.49803	8.61536	7.72126		Mean	1	1.19153	1.98395	2.52759		0.468441	0.802864	0.272623	0.447426	0.476737	0.57278	0.488045	0.405167	0.499496	0.68006
	StDev	0	0.245702	0.425415	0.150219		1.87786	2.03732	1.88836	2.29239	3.10663	4.03105	2.81259	2.6875	3.31167	3.13908		StDev	0	0.31519	0.635065	0.817948		0.161432	0.495971	0.0593213	0.124795	0.0877596	0.098354	0.168875	0.104151	0.129682	0.248108
