# Supplementary material for: The ectodomains determine ligand function in vivo and selectivity of DLL1 and DLL4 toward NOTCH1 and NOTCH2 in vitro
Source: eLife. 2018 Oct 5;7:e40045. doi: 10.7554/eLife.40045 (PMC6202052; doi:10.7554/eLife.40045)
Supplement: Figure 4—source data 1. — Relative luciferase activity (units) of different assays are means of ≥2 technical replicates (measurements of the same cell lysate) of each (co-)culture. [file elife-40045-fig4-data1.xlsx]

## Sheet: Figure 4-Source Data 1
	E14 (I)	E14rep + E14 (II)	E14rep + ES-DLL1 (III)	E14rep + ES-DLL4 (IV)	N1rep + E14 (V)	N1rep + ES-DLL1 (VI)
Assay # 1	36.75	102	156.75	142	75.25	774.5
Assay # 2	32.75	66.5	124.75	69.5	75	664.25
Assay # 3	27.75	54.25	110.5	75.75	65	538.5
Assay # 4					45	440.5
Assay # 5					64	444
Assay # 6					67.5	657.5
Assay # 7					59.5	706
Mean	32.4167	74.25	130.667	95.75	64.4643	603.607
StDev	4.50925	24.8005	23.6859	40.1754	10.3324	130.759
