# Supplementary material for: The ectodomains determine ligand function in vivo and selectivity of DLL1 and DLL4 toward NOTCH1 and NOTCH2 in vitro
Source: eLife. 2018 Oct 5;7:e40045. doi: 10.7554/eLife.40045 (PMC6202052; doi:10.7554/eLife.40045)
Supplement: Figure 4—source data 2. — DLL1 and DLL4 protein expression level in ES cells determined by quantitative analysis of Western blots (DLL1 or DLL4 expression intensity/𝛽-Tubulin intensity (DLL/𝛽-Tub)). Expression of DLL4 clone #1 was normalized to expression of DLL1 clone #1 analyzed in the same assay. The value obtained in Assay #7 (red) represents an outlier (determined by GraphPad Prism7) and was not included in the calculation of the average. [file elife-40045-fig4-data2.xlsx]

## Sheet: Figure 4-Source Data 2
	DLL1 clone #1 (DLL1/b-Tub)	DLL4 clone #1 (DLL4/b-Tub)	DLL1 clone #1 when normalized	DLL4 clone #1 normalized to DLL1 clone #1 expression
Assay # 1	1.107	0.946	1	0.85411
Assay # 2		0.986		0.890876
Assay # 3		0.644		0.581301
Assay # 4	0.978	0.653	1	0.667377
Assay # 5		0.489		0.499471
Assay # 6		0.473		0.483613
Assay # 7	0.036	0.076	1	2.13895
Assay # 8	0.58	0.416	1	0.717012
Assay # 9	0.227	0.14	1	0.61652
Assay # 10	0.541	0.465	1	0.859282
Assay # 11	1.312	0.989	1	0.754061
Assay # 12	0.975	0.569	1	0.583784
Assay # 13	0.581	0.468	1	0.805416
Assay # 14	0.665	0.437	1	0.656694
Mean	0.7002	0.553643	1	0.689963
StDev	0.396203	0.27823	0	0.136354
