# Supplementary material for: The ectodomains determine ligand function in vivo and selectivity of DLL1 and DLL4 toward NOTCH1 and NOTCH2 in vitro
Source: eLife. 2018 Oct 5;7:e40045. doi: 10.7554/eLife.40045 (PMC6202052; doi:10.7554/eLife.40045)
Supplement: Figure 4—source data 3. — Relative cell surface levels of DLL1 (ES clone #1) and DLL4 (ES cell clone #1) proteins determined by cell surface biotinylation and quantitative analysis of Western blots after immunoprecipitation. [file elife-40045-fig4-data3.xlsx]

## Sheet: Figure 4-Source Data 3
	DLL1 clone #1	DLL4 clone #1
Assay # 1	0.327203	0.352327
Assay # 2	0.268407	0.413548
Assay # 3	0.292619	0.377386
Assay # 4	0.230059	0.423327
Assay # 5	0.212435	0.700179
Assay # 6	0.359939	0.678973
Assay # 7		0.724526
Assay # 8		0.647798
Mean	0.281777	0.539758
StDev	0.056484	0.161204
