# Supplementary material for: The ectodomains determine ligand function in vivo and selectivity of DLL1 and DLL4 toward NOTCH1 and NOTCH2 in vitro
Source: eLife. 2018 Oct 5;7:e40045. doi: 10.7554/eLife.40045 (PMC6202052; doi:10.7554/eLife.40045)
Supplement: Figure 4—source data 4. — Relative luciferase activity (units) for each assay was calculated by subtraction of E14 background values. Normalized activation (fold change) was obtained by normalization to DLL1 activity and correction for protein and cell surface levels based on the values for relative protein expression (Figure 4—source data 2) and cell surface presentation (Figure 4—source data 3). Normalized activation = normalized activation x [prot level DLL1/prot level DLL4] x [rel surface level DLL1/rel surface level DLL4]. [file elife-40045-fig4-data4.xlsx]

## Sheet: Figure 4-Source Data 4
	relative luciferase units minus background (rel. luciferase activity (units))		fold activation (RLU_DLL4/RLU_DLL1)	normalized activation (fold change)
	DLL1 clone #1	DLL4 clone #1		DLL1 clone #1	DLL4 clone #1
Assay #1	393.5	6211.5	15.7853	1	11.9429	1.164
Assay #2	465.5	6750	14.5005	1	10.9709	1.164
Assay #3	698.5	7906	11.3185	1	8.56346	1.164
Assay #4	408.5	5638	13.8017	1	10.4422	1.164
Assay #5	348	5616.5	16.1394	1	12.2108	1.164
Assay #6	329	2917.5	8.86778	1	6.70925	1.164
Assay #7	354.5	4504	12.7052	1	9.61261	1.164
Assay #8	505	5335.5	10.5653	1	7.99361	1.164
Assay #9	563	6277.5	11.1501	1	8.43602	1.164
Assay #10	250	2613.5	10.454	1	7.90936	1.164
Assay #11	241	2675.5	11.1017	1	8.39937	1.164
Assay #12	311	3474	11.1704	1	8.4514	1.164
Assay #13	223	2830.5	12.6928	1	9.60323	1.164
Assay #14	414	4927	11.901	1	9.00412	1.164
Assay #15	425.5	5188	12.1927	1	9.22485	1.164
Assay #16	301	4353	14.4618	1	10.9416	1.164
Assay #17	323.5	5532.5	17.102	1	12.9392	1.164
Assay #18	403.5	8908	22.0768	1	16.703	1.164
Assay #19	328.5	6435.5	19.5906	1	14.822	1.164
Assay #20	1029	11614.5	11.2872	1	8.53973	1.164
Assay #21	356.5	4495	12.6087	1	9.53958	1.164
Assay #22	240	4982.5	20.7604	1	15.7071	1.164
Assay #23	300	4400	14.6667	1	11.0966	1.164
Assay #24	374	6537.5	17.4799	1	13.2251	1.164
Assay #25	261	4717	18.0728	1	13.6736	1.164
Assay #26	446	4211.5	9.44283	1	7.14432
Assay #27	341	4048.5	11.8724	1	8.98253
Assay #28	248	2463	9.93145	1	7.51401
Assay #29	183.5	2443.5	13.3161	1	10.0748
Assay #30	208.5	2813.5	13.494	1	10.2094
Assay #31	469	5266.5	11.2292	1	8.49588
Assay #32	572	4512.5	7.88899	1	5.96871
Assay #33	307	3804	12.3909	1	9.37478
Assay #34	606	3728	6.15182	1	4.65438
Assay #35	184	1297.5	7.05163	1	5.33517
Assay #36	583	1556.5	2.66981	1	2.01995
Assay #37	298	3070.5	10.3037	1	7.79564
Assay #38	575	5263	9.15304	1	6.92508
Assay #39	260	2172	8.35385	1	6.32041
Mean	387.897	4653.62	12.4539	1	9.42248
StDev	165.071	2041.83	3.96115	0	2.99696
