# Supplementary material for: The ectodomains determine ligand function in vivo and selectivity of DLL1 and DLL4 toward NOTCH1 and NOTCH2 in vitro
Source: eLife. 2018 Oct 5;7:e40045. doi: 10.7554/eLife.40045 (PMC6202052; doi:10.7554/eLife.40045)
Supplement: Figure 4—source data 5. — Luciferase activity (units) for each assay was calculated by subtraction of the E14 background values. Normalized activation (fold change) was obtained by normalization to DLL1 activity and correction for protein and cell surface levels based on the values for relative protein expression (Figure 4—source data 2) and cell surface presentation (Figure 4—source data 3). Normalized activation = normalized activation x [prot level DLL1/prot level DLL4] x [rel surface level DLL1/rel surface level DLL4]. [file elife-40045-fig4-data5.xlsx]

## Sheet: Figure 4-Source Data 5
	relative luciferase units minus background (rel. Luciferase activity (units))		fold activation (RLU_DLL4/RLU_DLL1)	Normalized activation (fold change)
	DLL1 clone #1	DLL4 clone #1		DLL1 clone #1	DLL4 clone #1
Assay #1	232.5	90	0.387097	1	0.292872	1.164
Assay #2	191	48	0.251309	1	0.190137	1.164
Assay #3	369.5	145.5	0.393775	1	0.297925	1.164
Assay #4	259	76.5	0.295367	1	0.223471	1.164
Assay #5	185	58.5	0.316216	1	0.239245	1.164
Assay #6	156	88.5	0.567308	1	0.429218	1.164
Assay #7	318	119	0.374214	1	0.283125	1.164
Assay #8	350.5	125	0.356633	1	0.269824	1.164
Assay #9	612	175	0.285948	1	0.216344	1.164
Assay #10	297.5	110.5	0.371429	1	0.281018	1.164
Assay #11	539.5	290	0.537535	1	0.406692	1.164
Assay #12	591.5	241.5	0.408284	1	0.308902	1.164
Assay #13	654	237.5	0.36315	1	0.274755	1.164
Assay #14	728.5	296.5	0.407001	1	0.307932	1.164
Assay #15	599	300.5	0.501669	1	0.379557	1.164
Assay #16	825	300	0.363636	1	0.275123	1.164
Assay #17	597.5	458.5	0.767364	1	0.580578	1.164
Assay #18	614.5	310	0.504475	1	0.381679	1.164
Assay #19	479.5	288	0.600626	1	0.454426	1.164
Assay #20	673	331	0.491828	1	0.372111	1.164
Assay #21	442.5	209	0.472316	1	0.357349	1.164
Assay #22	345.5	186	0.53835	1	0.407309	1.164
Assay #23	234	143	0.611111	1	0.462359	1.164
Assay #24	330	251	0.760606	1	0.575465	1.164
Assay #25	294.5	244	0.828523	1	0.62685	1.164
Assay #26	310	95	0.306452	1	0.231857
Assay #27	292	125	0.428082	1	0.323882
Assay #28	230	103	0.447826	1	0.33882
Assay #29	205.5	96.5	0.469586	1	0.355283
Assay #30	171.5	64.5	0.376093	1	0.284547
Assay #31	106.5	71.5	0.671362	1	0.507944
Assay #32	192.5	111	0.576623	1	0.436266
Assay #33	233	223.5	0.959227	1	0.725739
Assay #34	581.5	256	0.440241	1	0.333081
Assay #35	214	85	0.397196	1	0.300514
Assay #36	422	110	0.260664	1	0.197215
Assay #37	413.5	111.5	0.269649	1	0.204013
Assay #38	99	46	0.464646	1	0.351546
Assay #39	83	37	0.445783	1	0.337274
Mean	371.115	170.731	0.468441	1	0.354417
StDev	195.239	101.115	0.161432	0	0.122137
