# Supplementary material for: The ectodomains determine ligand function in vivo and selectivity of DLL1 and DLL4 toward NOTCH1 and NOTCH2 in vitro
Source: eLife. 2018 Oct 5;7:e40045. doi: 10.7554/eLife.40045 (PMC6202052; doi:10.7554/eLife.40045)
Supplement: Figure 5—source data 1. — Values represent relative luciferase activity (units) after subtraction of E14 background RLUs. [file elife-40045-fig5-data1.xlsx]

## Sheet: Figure 5-Source Data 1
	DLL1					DLL4											D1ECD_D4ICD				D4ECD_D1ICD				D1N-E3_D4				D4N-E3_D1				D1N-E2_D4				D4N-E2_D1				D1N-D_D4				D4N-D_D1				D1contD4
	clone					clone											clone				clone				clone				clone				clone				clone				clone				clone				clone
	#1	#2	#3	#4		#1	#2	#3	#4	#5	#6	#7	#8	#9	#10		#1	#2	#3		#1	#2	#3		#1	#2	#3		#1	#2	#3		#1	#2	#3		#1	#2	#3		#1	#2	#3		#1	#2	#3		#1
N1 activation (RLU)
Assay# 1	393.5					6211.5																			955.5	1093.5							3931.5		3279.5
Assay# 2	465.5					6750																			1034	969							3638		3972
Assay# 3	698.5					7906																				1728							4663
Assay# 4	408.5					5638																				1813							1851.5
Assay# 5	348					5616.5																				2002.5							2090
Assay# 6	329					2917.5																				1210.5							1969
Assay# 7	354.5					4504																				1106							1368
Assay# 8	505					5335.5																															204	64.5
Assay# 9	563					6277.5																							264	513							219	94.5
Assay# 10	250					2613.5																				1179.5			505.5				1871				150.5
Assay# 11	241					2675.5																				1663.5	1106		116.5	440	372.5		2818	2739	1682		140.5	87	84.5
Assay# 12	311					3474																																			397.5	234.5	546		360.5	242.5	160
Assay# 13	223					2830.5																																			232	222.5	555		345.5	270	216
Assay# 14	414					4927																																			396.5	336.5	915		507	343	318
Assay# 15	425.5					5188
Assay# 16	301					4353
Assay# 17	323.5					5532.5
Assay# 18	403.5					8908
Assay# 19	328.5					6435.5
Assay# 20	1029					11614.5
Assay# 21	356.5					4495																																											674.5
Assay# 22	240					4982.5																																											853
Assay# 23	300					4400																																											804.5
Assay# 24	374					6537.5											469.5	1363	1156.5		3625.5	3658	6123
Assay# 25	261					4717											546	1308	925		4482.5	5842	6545.5
Assay# 26	446					4211.5											404	1795.5	913.5		2358	2436.5	2450.5
Assay# 27	341					4048.5																			1608.5	1379.5	321		140.5	316	310
Assay# 28	248					2463																			1030.5	740	170.5		148	237.5	176
Assay# 29	183.5					2443.5																					127.5						930.5	1179.5	1757.5		48.5	38	34.5
Assay# 30	208.5					2813.5																											1364.5	1445	1518.5		88.5	44	58
Assay# 31	469	214.5	761.5	411		5267
Assay# 32	572	128	468.5	329.5		4513
Assay# 33	307	219.5	448.5	225.5		3804
Assay# 34	606					3728	7503	5761.5	6112	6297.5	5495.5	4005.5	3025	4300.5	3954
Assay# 35	184					1297.5	1577.5	1535	1597	1264	1674	1442.5	1509	1896.5	1714
Assay# 36	583					1556.5	4590	3741	3504	2523	2481.5	1705.5	2057.5	2802	2303.5
Assay# 37	298					3070.5	3147.5	3241	3384	3254.5	4210.5	2849	2762.5	3651	3306
Assay# 38	575					5263
Assay# 39	260					2172
Mean	387.897	187.333	559.5	322		4653.64	4204.5	3569.62	3649.25	3334.75	3465.38	2500.62	2338.5	3162.5	2819.38		473.167	1488.83	998.333		3488.67	3978.83	5039.67		1157.12	1353.18	431.25		234.9	376.625	286.167		2408.64	1787.83	2441.9		141.833	65.6	59		342	264.5	672		404.333	285.167	231.333		777.333
StDev	165.071	51.445	175.223	92.9771		2041.83	2519.73	1739.86	1859.06	2139.41	1717.91	1174.43	687.529	1043.45	1002.02		71.071	267.001	137.097		1068.84	1725.27	2252.21		303.087	396.632	457.419		161.673	123.35	100.395		1197.18	834.363	1111.45		65.5009	25.1132	25.015		95.2641	62.6418	210.492		89.2277	51.9383	80.1083		92.2989
[truncated: 8 more columns]
