# Supplementary material for: The ectodomains determine ligand function in vivo and selectivity of DLL1 and DLL4 toward NOTCH1 and NOTCH2 in vitro
Source: eLife. 2018 Oct 5;7:e40045. doi: 10.7554/eLife.40045 (PMC6202052; doi:10.7554/eLife.40045)
Supplement: Figure 5—source data 2. — Values represent relative luciferase activity (units) after subtraction of E14 background RLUs. [file elife-40045-fig5-data2.xlsx]

## Sheet: Figure 5-Source Data 2
	DLL1					DLL4											D1ECD_D4ICD				D4ECD_D1ICD				D1N-E3_D4				D4N-E3_D1				D1N-E2_D4				D4N-E2_D1				D1N-D_D4				D4N-D_D1				D1contD4
	clone					clone											clone				clone				clone				clone				clone				clone				clone				clone				clone
	#1	#2	#3	#4		#1	#2	#3	#4	#5	#6	#7	#8	#9	#10		#1	#2	#3		#1	#2	#3		#1	#2	#3		#1	#2	#3		#1	#2	#3		#1	#2	#3		#1	#2	#3		#1	#2	#3		#1
N2 activation (RLU)
Assay# 1	232.5					90																			520	565.5							557.5		302
Assay# 2	191					48																			374.5	545.5							580.5		323.5
Assay# 3	369.5					145.5																				542.5							719.5
Assay# 4	259					76.5																				266							257
Assay# 5	185					58.5																				238.5							302.5
Assay# 6	156					88.5																				387.5							453
Assay# 7	318					119																				292.5							502
Assay# 8	350.5					125																															46.5	12.5
Assay# 9	612					175																							39	39							29.5	14
Assay# 10	297.5					110.5																				491.5			11				877.5				28
Assay# 11	539.5					290																				1037			51.5	82	44		1389	1241.5	1275.5		57.5	24.5	25.5
Assay# 12	591.5					241.5																																			257.5	248	214		121.5	313.5	276
Assay# 13	654					237.5																																			213.5	205	203		185.5	148	208
Assay# 14	728.5					296.5																																			189.5	277.5	228		211.5	286	361
Assay# 15	599					300.5
Assay# 16	825					300
Assay# 17	597.5					458.5
Assay# 18	614.5					310
Assay# 19	479.5					288
Assay# 20	673					331
Assay# 21	442.5					209																																											437
Assay# 22	345.5					186																																											565
Assay# 23	234					143																																											365.5
Assay# 24	330					251											1211	992.5	1176		328	156	454
Assay# 25	294.5					244											940	836	1157		329	167	484
Assay# 26	310					95											545.5	495.5	685.5		109.5	83.5	141
Assay# 27	292					125																			436	376.5	240.5		21	42.5	38
Assay# 28	230					103																			393	278	147		0.5	4	4
Assay# 29	205.5					96.5																					198						316.5	491.5	485		8.5	17.5	5.5
Assay# 30	171.5					64.5																											437.5	409.5	436		2.5	-4.5	7
Assay# 31	106.5	123.5	289	352.5		72
Assay# 32	192.5	172	299.5	499.5		111
Assay# 33	233	354.5	392	391		224
Assay# 34	582					256	423	144.5	199	244	320.5	187	237	183	202.5
Assay# 35	214					85	325	59.5		112	153	126	86.5	128	203
Assay# 36	422					110	240	89.5	247	243	206.5	283.5	224.5	213	294
Assay# 37	414					111.5	164	145.5	171.5	160.5	221.5	153	114.5	240	300.5
Assay# 38	99					46
Assay# 39	83					37
Mean	371.141	216.667	326.833	414.333		170.756	288	109.75	205.833	189.875	225.375	187.375	165.625	191	250		898.833	774.667	1006.17		255.5	135.5	359.667		430.875	456.455	195.167		24.6	41.875	28.6667		581.136	714.167	564.4		28.75	12.8	12.6667		220.167	243.5	215		172.833	249.167	281.667		455.833
StDev	195.256	121.806	56.6797	76.2272		101.109	111.466	42.5078	38.211	65.0107	69.9004	68.7718	76.2347	48.0208	54.6245		334.654	254.113	277.868		126.441	45.3679	189.964		64.7616	227.846	46.8143		20.6743	31.9019	21.5716		324.996	458.521	404.766		21.1749	10.7215	11.1393		34.4867	36.4589	12.53		46.3177	88.6853	76.6572		101.075
[truncated: 8 more columns]
