# Supplementary material for: The ectodomains determine ligand function in vivo and selectivity of DLL1 and DLL4 toward NOTCH1 and NOTCH2 in vitro
Source: eLife. 2018 Oct 5;7:e40045. doi: 10.7554/eLife.40045 (PMC6202052; doi:10.7554/eLife.40045)
Supplement: Figure 5—source data 3. — Values represent N1/N2 activation ratio. Values were used for generation of graphs in Figure 5A and D. Red values were identified as outliers (determined by ROUT analysis by GraphPad Prism7) and excluded from calculations. [file elife-40045-fig5-data3.xlsx]

## Sheet: Figure 5-Source Data 3
	DLL1					DLL4											D1ECD_D4ICD				D4ECD_D1ICD				D1N-E3_D4				D4N-E3_D1				D1N-E2_D4				D4N-E2_D1				D1N-D_D4				D4N-D_D1				D1contD4
	clone					clone											clone				clone				clone				clone				clone				clone				clone				clone				clone
	#1	#2	#3	#4		#1	#2	#3	#4	#5	#6	#7	#8	#9	#10		#1	#2	#3		#1	#2	#3		#1	#2	#3		#1	#2	#3		#1	#2	#3		#1	#2	#3		#1	#2	#3		#1	#2	#3		#1
N1/N2 activation (RLU)
Assay# 1	1.69247					69.0167																			1.8375	1.93369							7.05202		10.8593
Assay# 2	2.43717					140.625																			2.76101	1.77635							6.26701		12.2782
Assay# 3	1.89039					54.3368																				3.18525							6.48089
Assay# 4	1.57722					73.6993																				6.81579							7.20428
Assay# 5	1.88108					96.0085																				8.39623							6.90909
Assay# 6	2.10897					32.9661																				3.12387							4.34658
Assay# 7	1.11478					37.8487																				3.7812							2.7251
Assay# 8	1.4408					42.684																															4.3871	5.16
Assay# 9	0.919935					35.8714																							6.76923	13.1538							7.42373	6.75
Assay# 10	0.840336					23.6516																				2.3998			45.9545				2.13219				5.375
Assay# 11	0.44671					9.22586																				1.60415			2.26214	5.36585	8.46591		2.0288	2.2062	1.3187		2.44348	3.55102	3.31373
Assay# 12	0.525782					14.3851																																			1.54369	0.945565	2.5514		2.96708	0.773525	0.57971
Assay# 13	0.340979					11.9179																																			1.08665	1.08537	2.73399		1.86253	1.82432	1.03846
Assay# 14	0.568291					16.6172																																			2.09235	1.21261	4.01316		2.39716	1.1993	0.880886
Assay# 15	0.710351					17.2646
Assay# 16	0.364848					14.51
Assay# 17	0.541423					12.0665
Assay# 18	0.656631					28.7355
Assay# 19	0.685089					22.3455
Assay# 20	1.52897					35.0891
Assay# 21	0.80565					21.5072																																											1.54348
Assay# 22	0.694645					26.7876																																											1.50973
Assay# 23	1.28205					30.7692																																											2.20109
Assay# 24	1.13333					26.0458											0.387696	1.3733	0.983418		11.0534	23.4487	13.4868
Assay# 25	0.886248					19.332											0.580851	1.56459	0.799481		13.6246	34.982	13.5238
Assay# 26	1.43871					44.3316											0.740605	3.62361	1.3326		21.5342	29.1796	17.3794
Assay# 27	1.16781					32.388																			3.68922	3.66401	1.33472		6.69048	7.43529	8.15789
Assay# 28	1.07826					23.9126																			2.62214	2.66187	1.15986		296	59.375	44
Assay# 29	0.892944					25.3212																					0.643939						2.93997	2.3998	3.62371		5.70588	2.17143	6.27273
Assay# 30	1.21574					43.6202																											3.11886	3.52869	3.4828		35.4	-9.77778	8.28571
Assay# 31	4.40376	1.73684	2.63495	1.16596		73.1528
Assay# 32	2.97143	0.744186	1.56427	0.65966		40.6577
Assay# 33	1.3176	0.619182	1.14413	0.576726		16.9821
Assay# 34	1.04124					14.5625	17.7376	39.872	30.7136	25.8094	17.1466	21.4198	12.7637	23.5	19.5259
Assay# 35	0.859813					15.2647	4.85385	25.7983		11.2857	10.9412	11.4484	17.4451	14.8164	8.44335
Assay# 36	1.38152					14.15	19.125	41.7989	14.1862	10.3827	12.0169	6.01587	9.16481	13.1549	7.83503
Assay# 37	0.719807					27.5381	19.1921	22.2749	19.7318	20.2773	19.009	18.6209	24.1266	15.2125	11.0017
Assay# 38	5.80808					114.413
Assay# 39	3.13253					58.7027
Mean	1.09107	1.0334	1.78112	0.800781		26.0214	15.2271	32.436	21.5439	16.9388	14.7785	14.3762	15.8751	16.671	11.7015		0.569717	2.18717	1.0385		15.4041	29.2035	14.7967		2.72747	3.0946	1.04617		15.4191	21.3325	20.2079		4.65498	2.71156	6.31254		5.06704	4.40811	5.95739		1.57423	1.08118	3.09952		2.40893	1.26572	0.833019		1.75144
StDev	1.10155	0.612394	0.768699	0.318959		11.4257	6.94794	9.83639	8.41136	7.41109	3.90968	6.97846	6.46172	4.63914	5.39372		0.176718	1.24767	0.270796		5.46234	5.7667	2.23682		0.759217	1.51397	0.359149		20.4656	25.5747	20.6051		2.13635	0.714244	4.91013		1.83046	1.98218	2.50095		0.503544	0.133573	0.796486		0.552366	0.528539	0.233092		0.389781
Mean of clones	1.17659					18.5569											1.26513				19.8014				2.28941				18.9865				4.55969				5.14418				1.91831				1.50255				1.64233
StDev of clones	0.422099					6.32875											0.8322				8.14809				1.09221				3.14022				1.80238				0.777514				1.05224				0.81421				0.152709
[truncated: 8 more columns]
