# Supplementary material for: The ectodomains determine ligand function in vivo and selectivity of DLL1 and DLL4 toward NOTCH1 and NOTCH2 in vitro
Source: eLife. 2018 Oct 5;7:e40045. doi: 10.7554/eLife.40045 (PMC6202052; doi:10.7554/eLife.40045)
Supplement: Supplementary file 1. — Levels of one representative clone for each ligand protein were determined by cell surface biotinylation and quantitative analysis of Western blots after immunoprecipitation. Values for DLL1 and DLL4 see Figure 4—source data 3. ND: due to closely co-migrating background band protein levels could not be quantified. Surface expression validated by biotinylation of ES cells and antibody staining of PSMs. [file elife-40045-supp1.xlsx]

## Sheet: Supplementary File 1
	DLL1		DLL4		D1ECD_D4ICD		D4ECD_D1ICD		D1N-E3_D4		D4N-E3_D1		D1N-E2_D4		D4N-E2_D1		D1N-D_D4		D4N-D_D1		D1contD4		D4contD1		D4N109G
Assay #1					0.582631		1.15543				0.32515		0.15787		0.415957		0.214903		0.215124		0.0948578		0.480955		0.598844
Assay #2					0.551553		0.992142				0.204048		0.238394		0.234638		0.0945129		0.597329		0.0603664		0.545682		0.306043
Assay #3					0.679263		0.508705				0.442415		0.200102		0.547577		0.0800953		0.929477		0.132451		0.327665		0.493836
Assay #4					0.517411		0.162609				0.390242										0.0752774		0.303465		0.610894
Assay #5											0.611652										0.0687601		0.398476		0.553254
Assay #6											0.659149										0.0787751		0.783417		0.332475
Assay #7											0.809748										0.0617737		0.488667		0.575663
Assay #8											0.777152														0.424097
Mean	0.28		0.54		0.582714		0.704721		ND		0.527444		0.198789		0.399391		0.129837		0.580643		0.0817516		0.475475		0.486888
StDev	0.06		0.16		0.0696594		0.453892		ND		0.219756		0.0402781		0.157126		0.0740209		0.357469		0.0252262		0.161929		0.119962
