# Supplementary material for: The ectodomains determine ligand function in vivo and selectivity of DLL1 and DLL4 toward NOTCH1 and NOTCH2 in vitro
Source: eLife. 2018 Oct 5;7:e40045. doi: 10.7554/eLife.40045 (PMC6202052; doi:10.7554/eLife.40045)
Supplement: Supplementary file 2. — The protein level of three independent clones used for co-culture studies was determined by quantitative analysis of Western blots and normalized to DLL1 clone #1 protein level measured in the same assay. Values for DLL1 and DLL4 see Figure 4—source data 2. ND: due to closely co-migrating background band protein levels could not be quantified. [file elife-40045-supp2.xlsx]

## Sheet: Supplementary File 2
	DLL1		DLL4		D1ECD_D4ICD				D4ECD_D1ICD				D1N-E3_D4				D4N-E3_D1				D1N-E2_D4				D4N-E2_D1				D1N-D_D4				D4N-D_D1				D1contD4				D4contD1				D4N109G
	clone		clone		clone				clone				clone				clone				clone				clone				clone				clone				clone				clone				clone
	#1		#1		#1	#2	#3		#1	#2	#3		#1	#2	#3		#1	#2	#3		#1	#2	#3		#1	#2	#3		#1	#2	#3		#1	#2	#3		#1	#2	#3		#1	#2	#3		#1	#2	#3
relative protein expression (normalized to DLL1 clone #1)
Assay #1					0.0240129	0.167609	0.333758		4.99875	2.2312	8.31044						0.351973	1.01825	0.780025		0.216877	0.0744459	0.190281		2.89546	1.02416	2.29198		0.101128	0.0310555	0.258294		1.01782	1.97278	0.806288		0.592291	0.795646	0.62303		0.136708	1.19939	1.03296		0.54453	0.679636	0.4217
Assay #2					0.196656	0.23503	0.549914		5.47722	2.5242	8.58465						0.382543	0.970533	1.062		0.305626	0.125801	0.104583		3.1442	2.12402	1.82531		0.100961	0.0543081	0.138907		1.27148	1.62062	0.870481		0.772879	0.725325	0.712259		0.204869	1.1814	0.970911		0.770153	0.778935	0.312324
Assay #3					0.217784	0.409262	0.395984		6.5771	2.39964	10.0486						0.563181	0.91311	1.17054		0.12087	0.13205	0.164976		3.0546	1.13054	0.928654		0.0937721	0.0587822	0.176115		1.50441	1.37389	0.801425		0.80692	0.992291	0.582443		0.264421	1.12641	1.33133		0.528563	0.832276	0.452377
Mean	1		0.6899		0.146151	0.270634	0.426552		5.68436	2.38501	8.98122		ND	ND	ND		0.432566	0.967298	1.00419		0.214458	0.110766	0.15328		3.03142	1.42624	1.68198		0.0986204	0.0480486	0.191105		1.26457	1.65576	0.826065		0.72403	0.837754	0.639244		0.201999	1.16907	1.11173		0.614415	0.763616	0.395467
StDev	0		0.1363		0.106301	0.124699	0.111273		0.809305	0.147044	0.934463		ND	ND	ND		0.114144	0.0526454	0.201575		0.0924017	0.0316086	0.0440301		0.125983	0.606632	0.692872		0.00419955	0.0148855	0.0610891		0.243369	0.300987	0.0385427		0.115352	0.138375	0.0664097		0.0639044	0.0380171	0.192689		0.135109	0.0774649	0.0736197
